# Supplementary material
Source: Springer Nature journal article supplement (https://www.springermedizin.de/resource/supplementary/12877_2013_981_MOESM1_ESM.pdf/9440832)

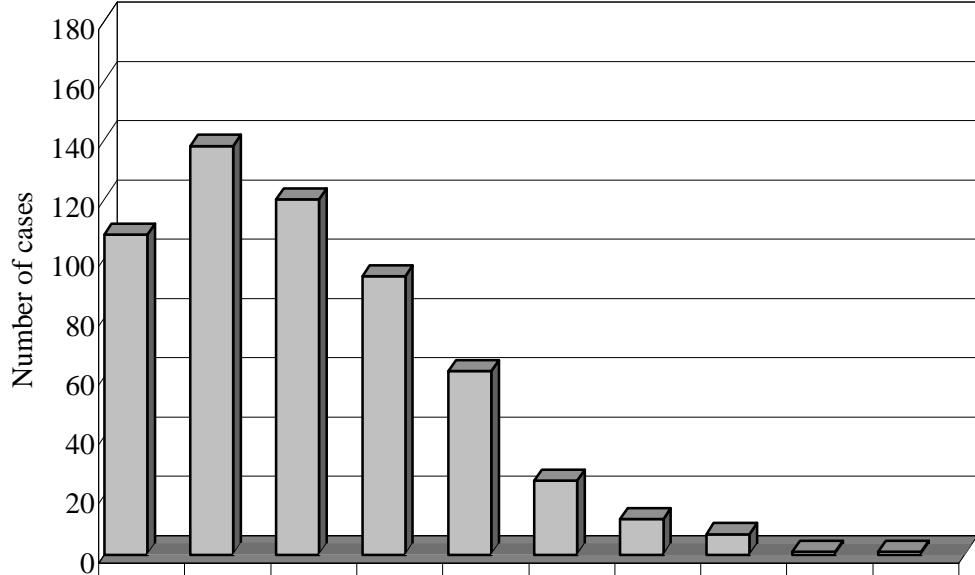

|                 |       |       |       |       |       |      |      |      |      |      |
|-----------------|-------|-------|-------|-------|-------|------|------|------|------|------|
| Number of cases | 108   | 138   | 120   | 94    | 62    | 25   | 12   | 7    | 1    | 1    |
| Percentage      | 19.0% | 24.3% | 21.1% | 16.5% | 10.9% | 4.4% | 2.1% | 1.2% | 0.2% | 0.2% |

Number of various complications in the acute ward

Supplement: MOESM1 [file 9440832]
